# PSYCHIATRIC SERVICES

**Subscribe today to APA's  
high-ranking mental health policy  
and services journal!**

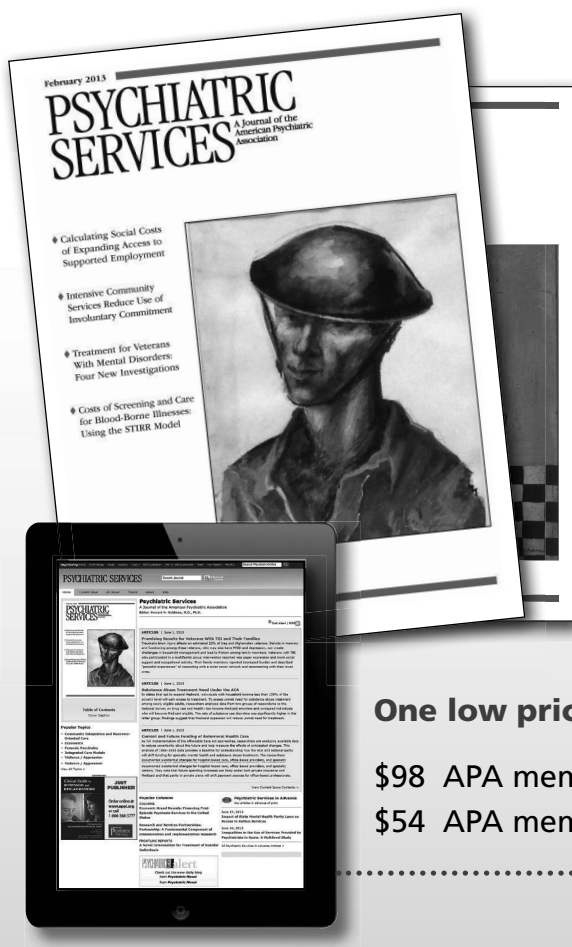

## Don't miss the October issue:

- Testing DSM-5 in routine settings: clinician feedback
- Effects of parity laws on coverage of autism services
- Measures of personal recovery: a review

## Coming in the November issue:

- Can ACT teams qualify as medical homes?
- Evolving role of psychiatry in health care reform
- Disparities in stimulant treatment: a national study

**One low price covers your print and online subscription.**

**\$98 APA member print and online subscription.**

**\$54 APA member online-only subscription.**

**Don't miss another issue of *Psychiatric Services*.**

**Subscribe today, visit [www.appi.org](http://www.appi.org) or call Customer Service at 1-800-368-5777**

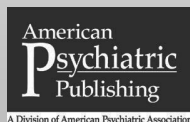

ISSN 1075-2730 • [ps.psychiatryonline.org](http://ps.psychiatryonline.org)

[www.appi.org](http://www.appi.org) • 1-800-368-5777 • Fax: 703-907-1091 • Email: [appi@psych.org](mailto:appi@psych.org)

Priority Code AH1325

# A Daily "Pearl" is Just a Click Away!

The Editors of *The American Journal of Psychiatry* have developed a special mobile-optimized website that displays a single bit of *Clinical Guidance* every day gleaned from research published on the pages of the *Journal*. Users can click through to the main article or explore an archive of all previously prepared *Clinical Guidance* pieces arranged by topic.

Visit **AJPClinical.com**

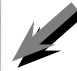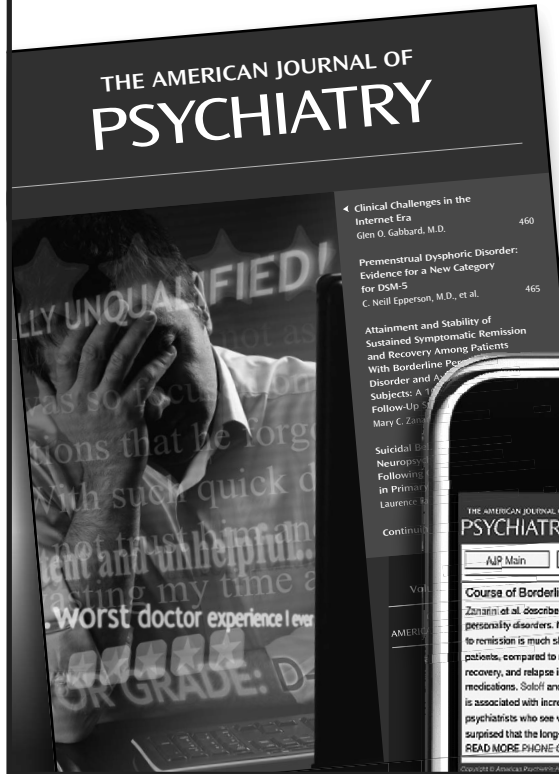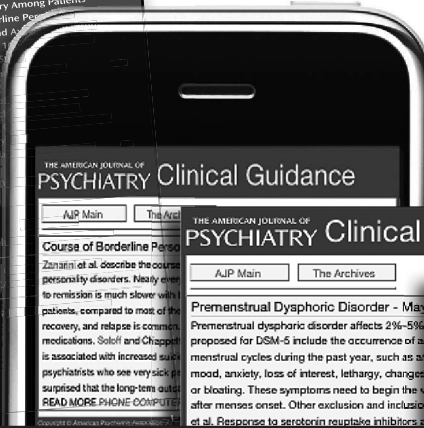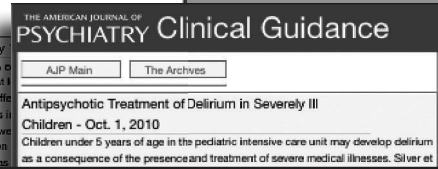

# New Premier Titles in Psychiatry

## Essentials of Clinical Psychopharmacology, Third Edition

Edited by Alan F. Schatzberg, M.D., and Charles B. Nemeroff, M.D., Ph.D.

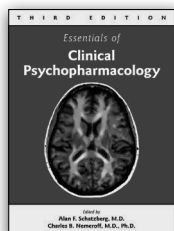

This third edition of *Essentials of Psychopharmacology* is based on the premier textbook in the field, *The American Psychiatric Publishing Textbook of Psychopharmacology*,

Fourth Edition. The *Essentials* format is designed to deliver core knowledge to the busy trainee or practitioner in a succinct and accessible manner.

2013 • 899 pages • ISBN 978-1-58562-419-5  
Paperback • \$159.00 • Item #62419

## Manual of Clinical Psychopharmacology for Nurses

Edited by Laura G. Leahy, M.S.N., P.M.H.-A.P.R.N., and Christian G. Kohler, M.D.

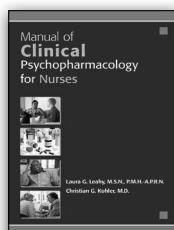

The book is designed to serve as both an academic textbook and a reference book for Psychiatric Mental Health Advanced Practice Registered Nurses (P.M.H.-A.P.R.N.s) as

well as mental health practitioners, general practitioners, and consumers.

2013 • 560 pages • ISBN 978-1-58562-434-8  
Paperback • \$65.00 • Item #62434

## Psycho-Oncology

Edited by Thomas N. Wise, M.D., Massimo Biondi, M.D., and Anna Costantini, Ph.D.

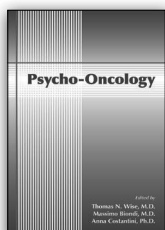

*Psycho-oncology* was written to assist oncologists, physicians, psychiatrists and other mental health clinicians, and hospital chaplains in understanding and offering supportive treatment to the individuals who will receive a cancer diagnosis during their lifetime.

2013 • 376 pages • ISBN 978-1-58562-423-2  
Paperback • \$74.00 • Item #62423

## Casebook of Neuropsychiatry

Edited by Trevor A. Hurwitz, M.B.Ch.B., and Warren T. Lee, M.D., Ph.D.

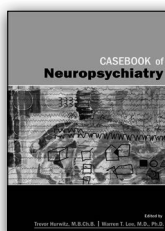

*Casebook of Neuropsychiatry* is comprised of 38 clinical cases based on real patient interactions that straddle the domains of neurology and psychiatry.

The book is designed to supplement comprehensive texts by providing real-world accounts of patient presentations that clinicians are likely to encounter.

2013 • 383 pages • ISBN 978-1-58562-431-7  
Paperback • \$75.00 • Item #62431

## Management of Adults With Traumatic Brain Injury

Edited by David B. Arciniegas, M.D., Nathan D. Zasler, M.D., Rodney D. Vanderploeg, Ph.D., and Michael S. Jaffee, M.D.

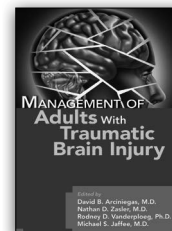

This is an up-to-the-minute, comprehensive, and useful text designed to support busy physicians, nurses, and mental health professionals working with persons with traumatic brain injury (TBI) and their families.

2013 • 587 pages • ISBN 978-1-58562-404-1  
Paperback • \$79.00 • Item #62404

## Clinical Guide to Depression and Bipolar Disorder

Findings From the Collaborative Depression Study

Martin B. Keller, M.D., Editor-in-Chief

William H. Coryell, M.D., Jean Endicott, Ph.D., Jack D. Maser, Ph.D., and Pamela J. Schettler, Ph.D., Co-Editors

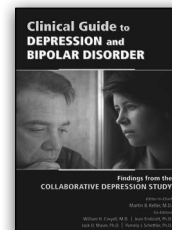

This book builds on research from the influential NIMH Collaborative Depression Study (CDS) to provide clinicians with information they can use to assess, diagnose, treat, and

understand how their patients will likely fare over the course of their illness.

2013 • 234 pages • ISBN 978-1-58562-433-1  
Paperback • \$55.00 • Item #62433

## DSM-5 COLLECTION

### Diagnostic and Statistical Manual of Mental Disorders, Fifth Edition (DSM-5™)

American Psychiatric Association

2013 • 991 pages • ISBN 978-0-89042-554-1  
Hardcover • \$199.00 • Item #2554

2013 • 991 pages • ISBN 978-0-89042-555-8  
Paperback • \$149.00 • Item #2555

2013 • 991 pages • ISBN 978-0-89042-557-2  
eBook • \$149.00 • Item #2557

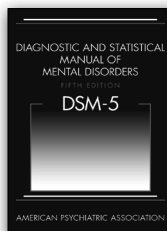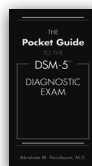

### The Pocket Guide to the DSM-5™ Diagnostic Exam

Abraham M. Nussbaum, M.D.

2013 • 281 pages • ISBN 978-1-58562-466-9 • Paperback  
\$65.00 • Item #62466

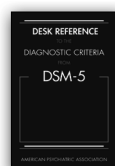

### Desk Reference to the Diagnostic Criteria From DSM-5™

American Psychiatric Association

2013 • 443 pages • ISBN 978-0-89042-556-5 • Paperback  
\$69.00 • Item #2556

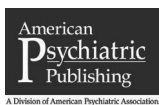

The First and Last Word in Psychiatry

Order Online: [www.appi.org](http://www.appi.org) • Phone: 1-800-368-5777 • Email: [appi@psych.org](mailto:appi@psych.org) • Fax: 703-907-1091

20% Discount For American Psychiatric Association Members! 25% Discount For APA Members-in-Training!
