# FOCUS

THE JOURNAL OF LIFELONG LEARNING IN PSYCHIATRY



## *Psychosomatic Medicine and Integrated Care*

*Guest Editor: Deane L. Wolcott, M.D.*

### IN CLINICAL SYNTHESIS:

Process of Psychiatric Consultation in the Medical Setting

*Elena Friedman, M.D., and Philip R. Muskin, M.D.*

Psychopharmacologic Treatment of Depression  
in Patients with Cancer: A 2013 Update

*Thomas B. Strouse, M.D.*

Supportive Oncology: New Models for the  
Role of Psychiatry in Cancer Care

*Deane L. Wolcott, M.D., Paul B. Jacobsen, Ph.D., and Matthew J. Loscalzo, M.S.W.*

Evaluation of Cognitive Impairment in Older Adults

*Douglas W. Scharre, M.D., and Paula T. Trzepacz, M.D.*

Collaborative Care Models for Comorbid Medical  
and Behavioral Health Conditions

*Lori Raney, M.D., Roger Kathol, M.D., and Paul Summergrad, M.D.*

AND INFLUENTIAL PUBLICATIONS...
