# Order

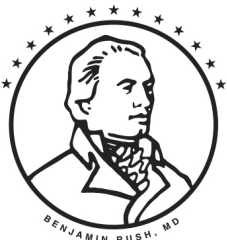

# APA Annual Meeting ON DEMAND

For a limited time, order APA Annual Meeting on Demand for \$1,399 and receive the latest generation iPad®!

APA Annual Meeting on Demand is a digital library of presentations from the 2013 American Psychiatric Association Annual Meeting.

Features of APA Annual Meeting on Demand include:

- Online access
- Over 300 hours of content
- **New! Enhanced Search:** Quickly find any word on any slide
- Streaming content on iPad® and most mobile devices
- Compact USB drive for offline access\*
- Downloadable MP3 files
- CME credit available

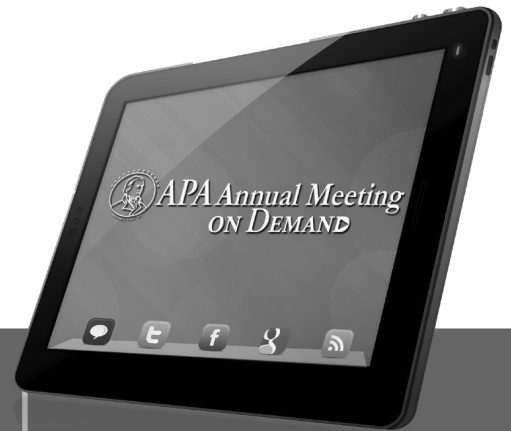

Order Online at:  
[orders.cmeoncall.com/  
APA/ADoffer](http://orders.cmeoncall.com/APA/ADoffer)

Or Contact us:  
800-501-2303  
Monday-Friday  
6:00am-5:00 pm PST

\* USB Drive does not include all of the functionality available online, such as MP3 downloads, Bookmarks and CME Testing
